# Supplementary material for: Solvent-free synthesis of crystalline mesoporous γ-Fe2O3 as an anode material in lithium-ion batteries
Source: Royal Society of Chemistry journal article supplement (doi:10.1039/c6ra10206a), 2016-01-01
Supplement: c6ra10206a1.pdf [file c6ra10206a1.pdf]

# Solvent-free synthesis of crystalline mesoporous $\gamma$ -Fe<sub>2</sub>O<sub>3</sub> as an anode material in lithium-ion batteries

Di Wu<sup>†a</sup>, Jin Ye<sup>†a</sup>, Lie Chen<sup>a</sup>, Yongzheng Wang<sup>a</sup>, Kai Fang<sup>a</sup>, Mingjiang Xie<sup>a</sup>, Luming Peng<sup>\*a</sup>, Xuefeng Guo<sup>\*a</sup> and Weiping Ding<sup>\*a</sup>

## Support Information

### Experimental Section

*Synthesis of mesoporous  $\gamma$ -Fe<sub>2</sub>O<sub>3</sub>:* The solid raw materials of Fe(NO<sub>3</sub>)<sub>3</sub>•9H<sub>2</sub>O and the triblock copolymer F127 (EO<sub>106</sub>PO<sub>70</sub>EO<sub>106</sub>) was mixed together. Then the mixture was heated in an autoclave at 80 °C and 10 r/min for 6 h. The resulting melting liquid was transferred to a petri dish and heating again at 80 °C for 48 h. After that the melting liquid had solidified and the product was gradually heated to 200 °C (1 °C /min) and was maintained at 200 °C for 10 h ( in the first 6 hours the product was in argon atmosphere and in the next 4 hours it was in vapor atmosphere). Finally the sample was further sintered at 300 °C (1 °C /min) for 4 h to remove the surfactant.

*Characterization:* Thermogravimetric (TG) was performed in NETZSCH STA 449C. The crystal structure was characterized by wide-angle X-ray powder diffraction (XRD) and the patterns were recorder on Philips X' Pro diffract meter using Cu K $\alpha$  radiation ( $\lambda = 1.5418 \text{ \AA}$ ) at 40 kV and 40 mA. N<sub>2</sub> adsorption-desorption isotherms were examined at 77 K by an adsorption apparatus (Micromeritics Tristar 3020). The microstructures were identified by transmission electron microscope (TEM, JEOL-2011).

*Electrochemical measurements:* The electrochemical tests were carried out using CR2032 type coin cells. The working electrode was prepared by mixing the electroactive material (50 wt%), acetylene black (conducting additive, 40 wt%), and polyvinylidene fluoride (binder, 10 wt%) in N-methyl-2-pyrrolidone (NMP). Then the resulting slurry was uniformly spread onto a copper foil current collector. After the desiccation of 4 h in an oven (80 °C), the electrodes then pressed and dried under vacuum at 120 °C for 12 h. The pure lithium metal was used both the reference and

the counter electrode at room temperature with Celgard 2325 film as the separator, while a 1 M  $\text{LiPF}_6$  in a mixture of ethylene carbonate (EC) / DMC / ethyl methyl carbonate (EMC) (1:1:1 in weight) was used as an electrolyte. The coin half cells were assembled in an Ar-filled glovebox in which both oxygen and moisture levels were strickly kept less than 1 ppm.

The obtained half cells were carried out Galvanostatical discharge-charge experiments at various current densities in a voltage range from 0.005 to 3.0 V (vs.  $\text{Li}^+/\text{Li}$ ) by using a battery test system (LAND CT2001A model, Wuhan Jinnuo Electronics Co. Ltd.).

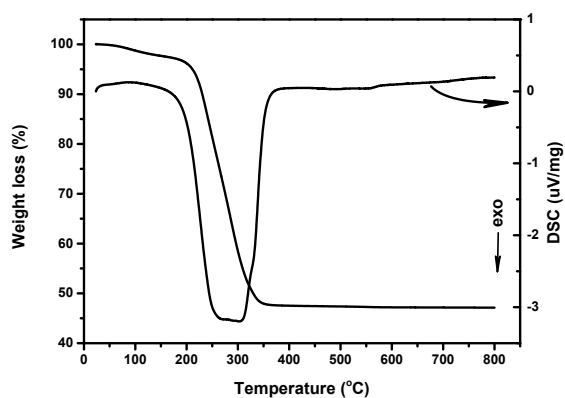

**Fig. S1** TG-DSC curves of the Fe-based intermediate (prepared without the final calcination) in air at a heating rate of 5 °C/min.

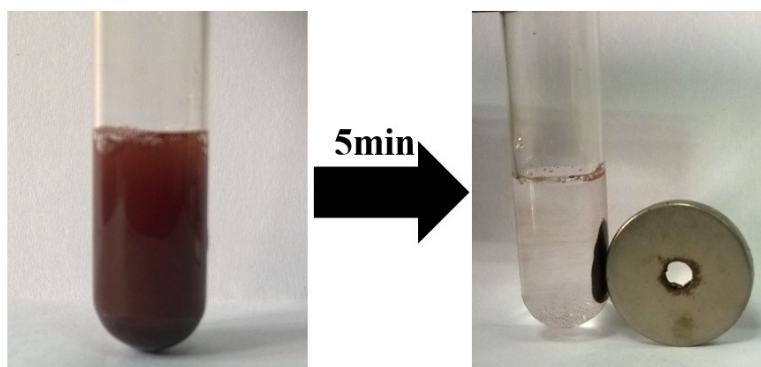

**Fig. S2** Magnetic separation of the obtained crystalline mesoporous  $\gamma\text{-Fe}_2\text{O}_3$ .

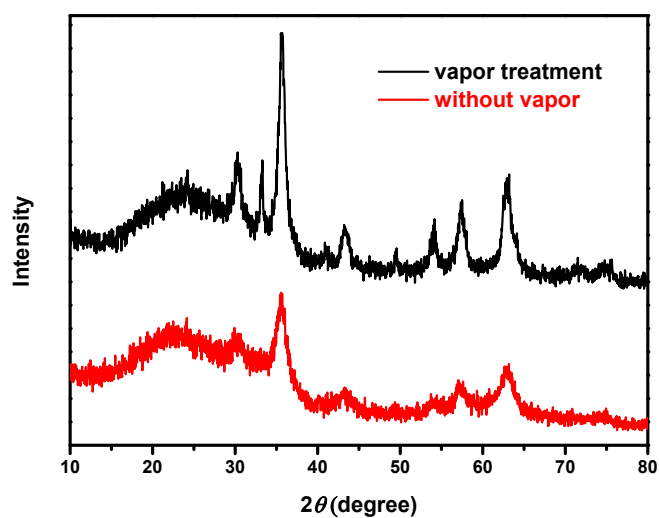

**Fig. S3** XRD pattern of the product with vapor treatment (black) and the product without vapor treatment.

**Table S1.** The effect of the aron treatment on the specific surface area and pore diameter

| Atmosphere of calcination | Specific Surface Area (m <sup>2</sup> /g) | Pore Diameter (nm) |
|---------------------------|-------------------------------------------|--------------------|
| Aron + Vapor + Air        | 146                                       | 3.0                |
| Vapor + Air               | 69                                        | 4.5, 17.0          |

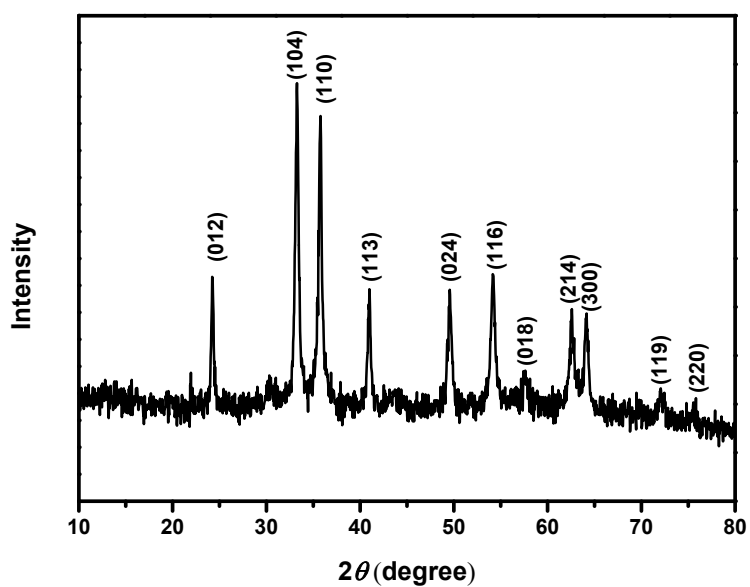

**Fig. S4** XRD pattern of the product calcined at 400 °C (JCPDS no. 79-0007).

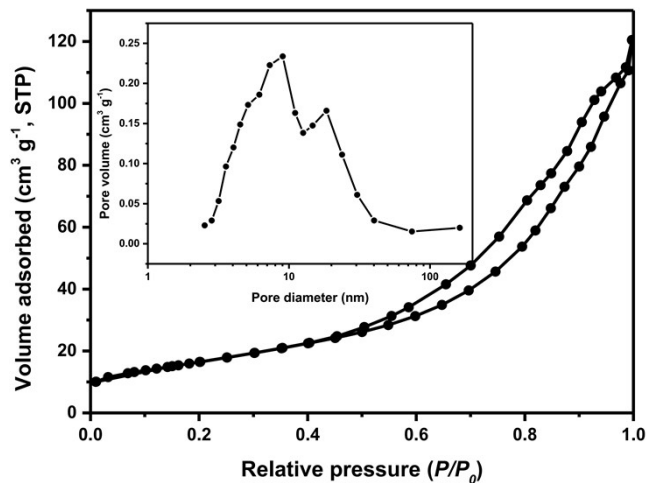

**Fig. S5**  $\text{N}_2$  adsorption-desorption isotherms and the pore size distribution of the product calcined at 400 °C.

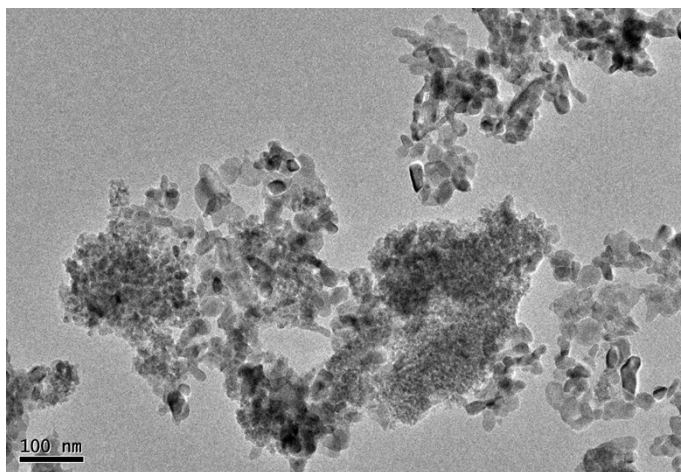

**Fig. S6** TEM image of the product calcined at 400 °C

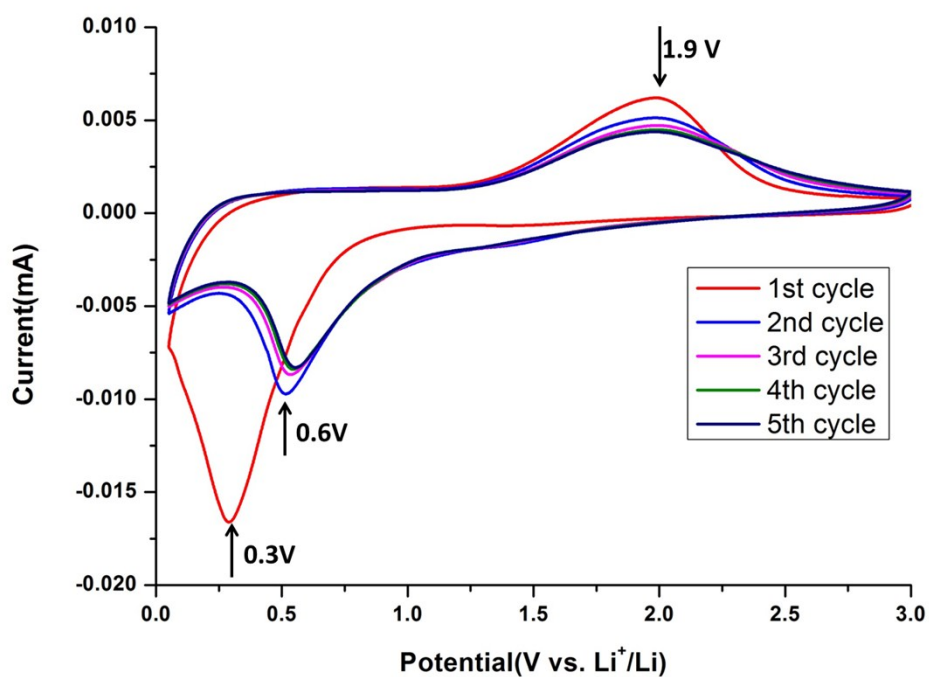

Fig. S7 Cycling voltammograms at a scan rate of 0.2 mV/s in the range of 0.005 ~ 3 V vs Li+/Li.

Table S2. LIBs performance of our obtained product and literature reported products

| Fe <sub>2</sub> O <sub>3</sub> anode material | Active material :<br>Carbon black : PVDF | Capacity retention<br>(mAh/g) / cycle<br>number (current<br>density (mA/g)) | Reference |
|-----------------------------------------------|------------------------------------------|-----------------------------------------------------------------------------|-----------|
| Mesoporous<br>nanostructure                   | 5 : 4 : 1                                | 1120 / 150 (200)                                                            | This work |
| Mesoporous<br>nanostructure                   | 5 : 4 : 1                                | 1293 / 50 (200)                                                             | [1]       |
| Tuneable porous<br>hematites                  | 5 : 4 : 1                                | 1296 / 50 (50)                                                              | [2]       |

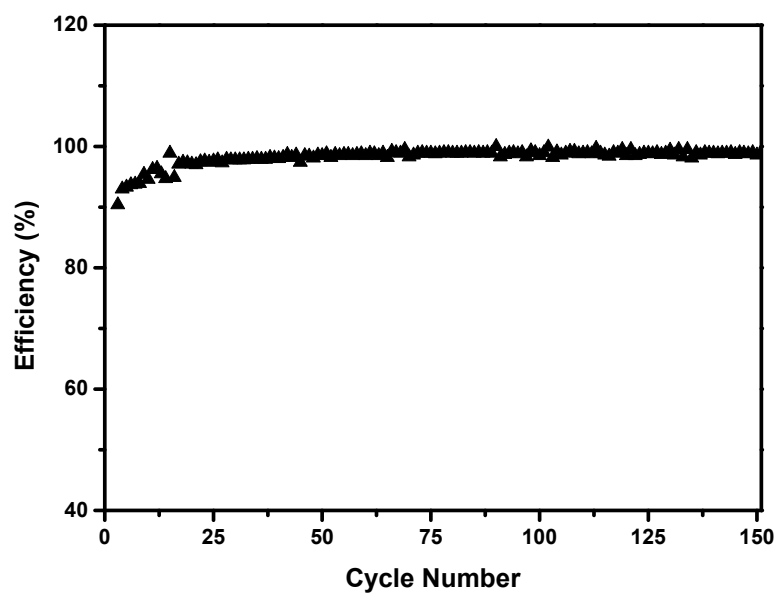

Fig. S8 Coulombic efficiency of the obtained crystalline mesoporous  $\gamma\text{-Fe}_2\text{O}_3$ .

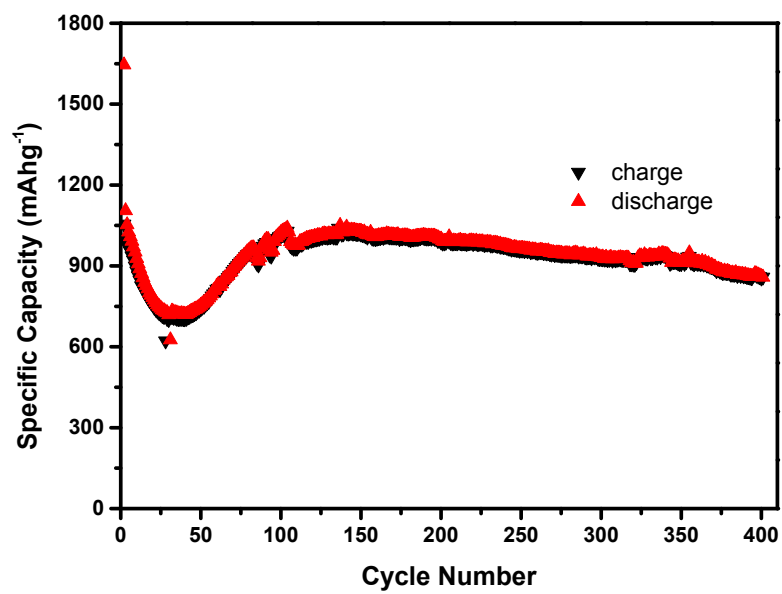

Fig. S9 Cycling performance of the obtained crystalline mesoporous  $\gamma\text{-Fe}_2\text{O}_3$  at  $2000\text{ mA g}^{-1}$ .

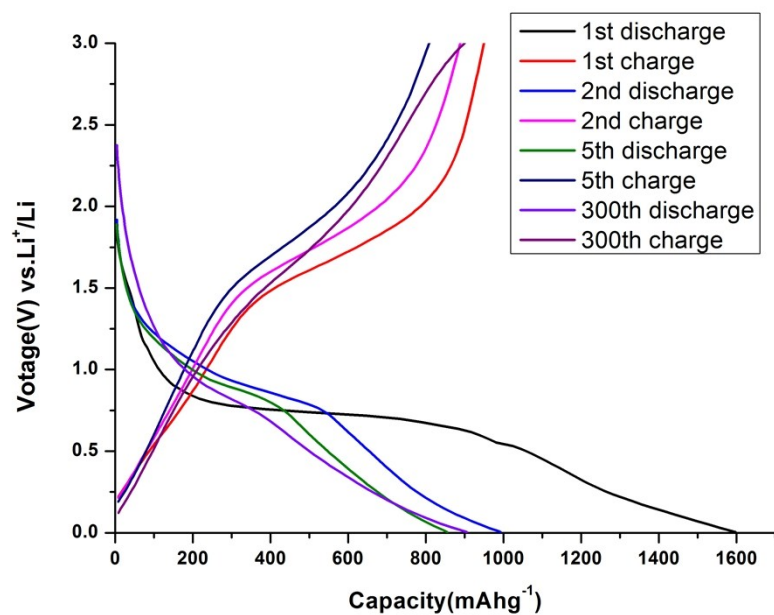

Fig. S10 discharge-charge curves of the obtained crystalline mesoporous  $\gamma\text{-Fe}_2\text{O}_3$  at  $2000 \text{ mA g}^{-1}$ .

#### References:

- 1 B. Sun, J. Horvat, H. S. Kim, W-S. Kim and J. Ahn, G. Wang, *J. Phys. Chem. C*, 2010, **114**, 18753.
- 2 D. Su, H-S. Kim, W-S. Kim and G. Wang, *Microporous Mesoporous Mater.*, 2012, **149**, 36.
